# Supplementary material
Source: PubMed Central journal article supplement (PMC3037603)
Supplement: mmc1.pdf [file mmc1.pdf]

## **Methods: Insertion of bacteriorhodopsin into the membrane**

Authors: Christian Kappel and Helmut Grubmuller

First, a pre-equilibrated membrane patch was taken and lipid molecules which would overlap with the proteins were removed so that 9 lipid molecules per bacteriorhodopsin monomer were left. As next step, the volume occupied by the proteins was then defined using the program MSMS (41). Because bacteriorhodopsin in lipid membranes forms a 2D crystal lattice, periodic images in the x-y plane had also to be taken into account. Bacteriorhodopsin was inserted in the pre-equilibrated membrane patch according to the protocol described in ref. (40).

## Results

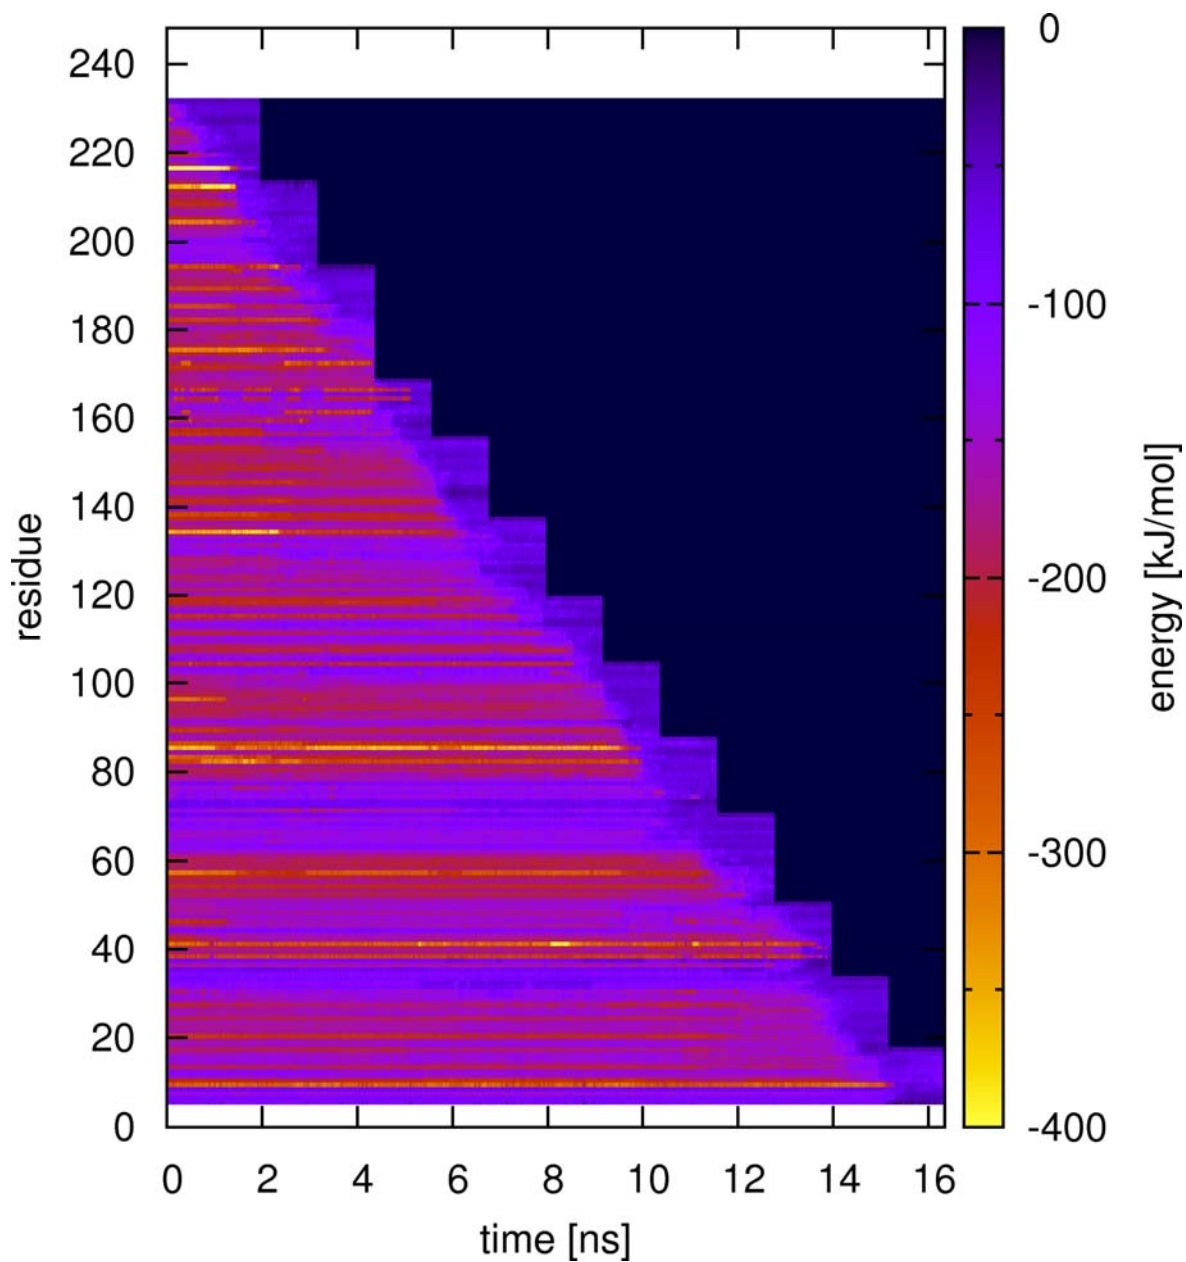

Figure S1: Time development of the sum of Coulombic and Lennard-Jones interactions between each individual residue and the rest of the protein during extraction and unfolding. Colors represent the strength of interaction.

## Results: Anchor point stabilization

| Anchor point (helix) | End of helix (hydrogen bond) | Center of helix (hydrogen bond) | Center of helix (hydrophobic contact) |
|----------------------|------------------------------|---------------------------------|---------------------------------------|
| Thr17 (A)            |                              | <b>X</b>                        |                                       |
| Leu48 (B)            |                              |                                 | <b>X</b>                              |
| Tyr79 (C)            | <b>X</b>                     |                                 |                                       |
| Thr89 (C)            |                              | <b>X</b>                        |                                       |
| Leu111 (D)           |                              |                                 | <b>X</b>                              |
| Ile119 (D)           |                              |                                 | <b>X</b>                              |
| Arg134 (E)           | <b>X</b>                     |                                 |                                       |
| Met145 (E)           |                              |                                 | <b>X</b>                              |
| Val179 (F)           |                              | <b>X</b>                        |                                       |
| Pro200 (G)           | <b>X</b>                     |                                 |                                       |

Table S1: Anchor points determined from extraction simulations towards the cytoplasmic side categorized by their location and stabilization.

## Results: Fit results from the relaxation simulations

|                    | partially unfolded helix G | partially unfolded helix F |
|--------------------|----------------------------|----------------------------|
| $F_1$              | (4070±50) pN               | (920±20) pN                |
| $F_2$              | (460±40) pN                | (302±2) pN                 |
| $F_{\text{final}}$ | (10±40) pN                 | (107±1) pN                 |
| $\tau_1$           | (730±5) ps                 | (95±2) ps                  |
| $\tau_2$           | (55000±6000) ps            | (4810±60) ps               |

Table S2: Values for all parameters from the bi-exponential fits employed to describe the forces in the relaxation simulations.
